# Supplementary material
Source: PubMed Central journal article supplement (PMC5555589)
Supplement: NIHMS889505-supplement-supplement_1.pdf [file NIHMS889505-supplement-supplement_1.pdf]

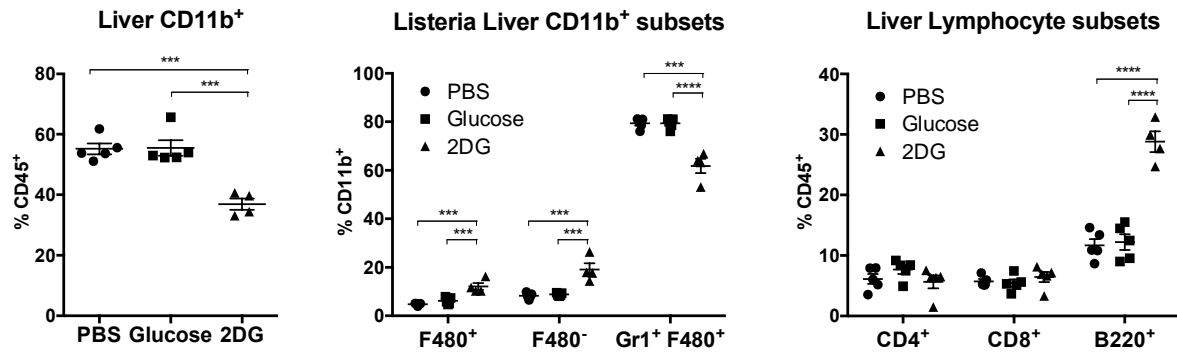

**Figure S1. The effect of glucose caloric supplementation or inhibition of glucose utilization on hepatic immune cell infiltration during *L. monocytogenes* infection, Related to Figure 1**

Flow cytometry analysis of CD45<sup>+</sup> cells within the liver 4 days after *L. monocytogenes* infection and treatment with PBS, glucose, or 2DG.

Data are represented as mean  $\pm$  SEM. \*\*\*p<0.001, \*\*\*\*p<0.0001.

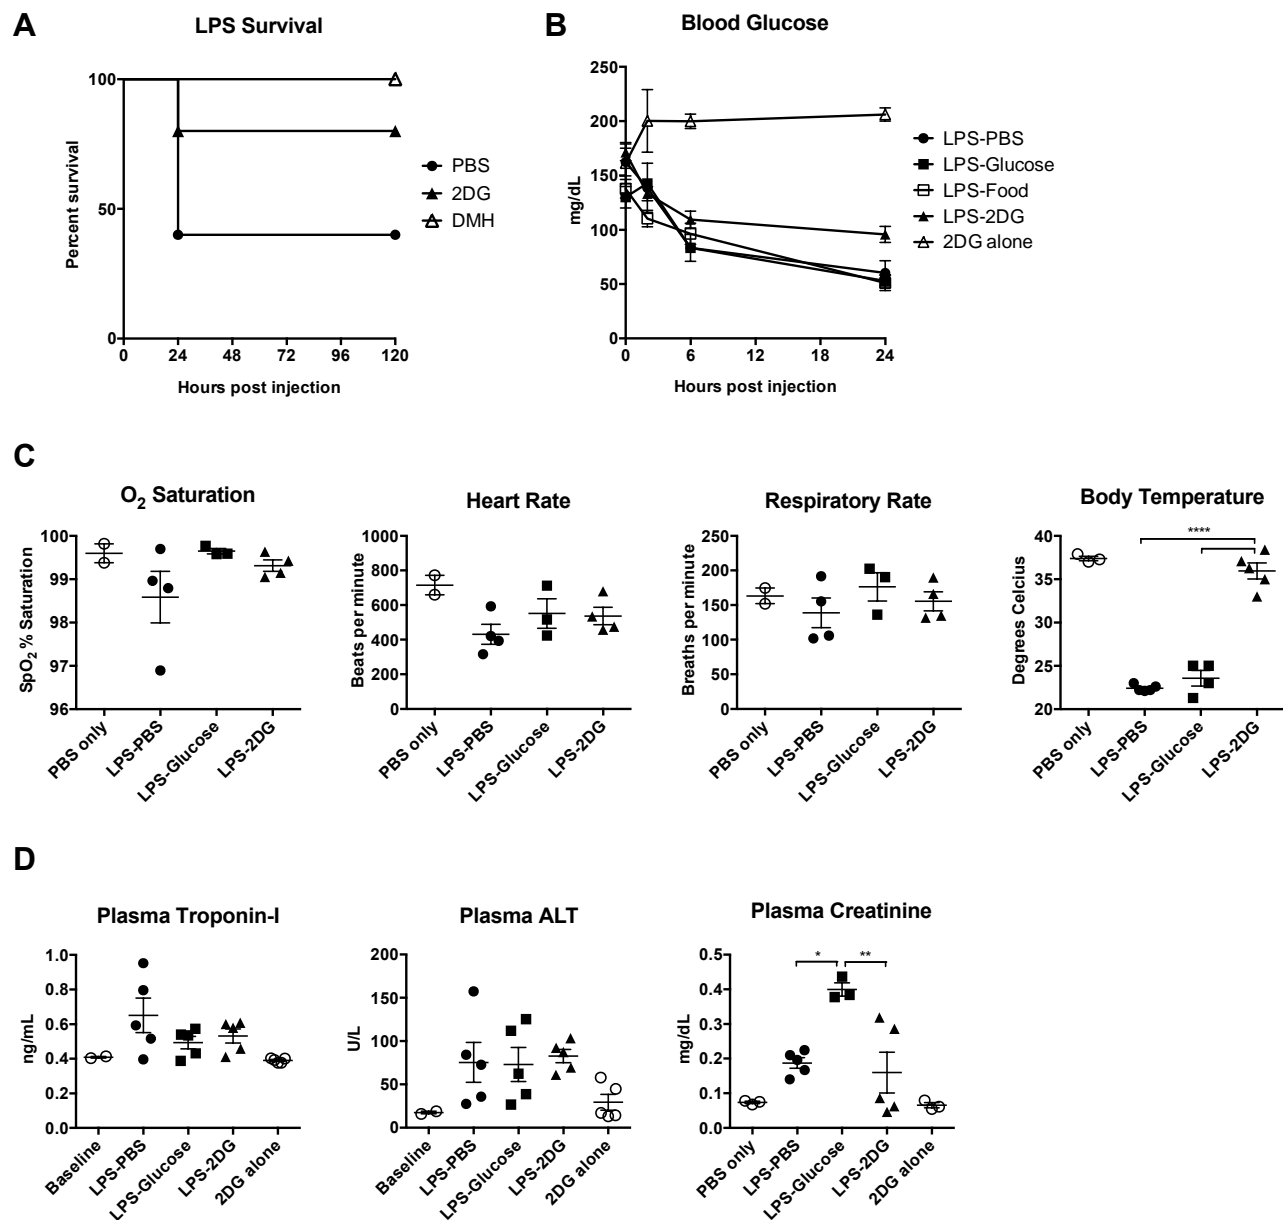

**Figure S2. Systemic effects of glucose caloric supplementation or inhibition of glucose utilization during LPS sepsis, Related to Figure 2**

(A) Mice were given 15 mg/kg IP LPS, then treated with PBS, 5 mg 2DG, 50 mg/kg D-mannoheptulose (DMH) given IP twice a day initiated one hour after LPS administration. n=5/group.

(B) Blood glucose at baseline, 2, 6 and 24 hours after 15 mg/kg IP LPS with PO gavage of PBS vehicle (LPS-PBS), glucose (LPS-Glucose), or Abbott Promote (LPS-Food) BID; or with IP 2DG (LPS-2DG). Blood glucose of mice treated with only 2DG IP are also shown.

(C-D) Mice were given 15 mg/kg IP LPS, then treated with IP PBS, glucose, or 2DG given IP.

(C) O<sub>2</sub> saturation, respiratory rate, heart rate and body temperature 24 hours after LPS.

(D) Plasma troponin-I, ALT, and creatinine levels measured at 24 hours after LPS.

Data are represented as mean  $\pm$  SEM. \*p<0.05, \*\*p<0.01, \*\*\*\*p<0.0001.

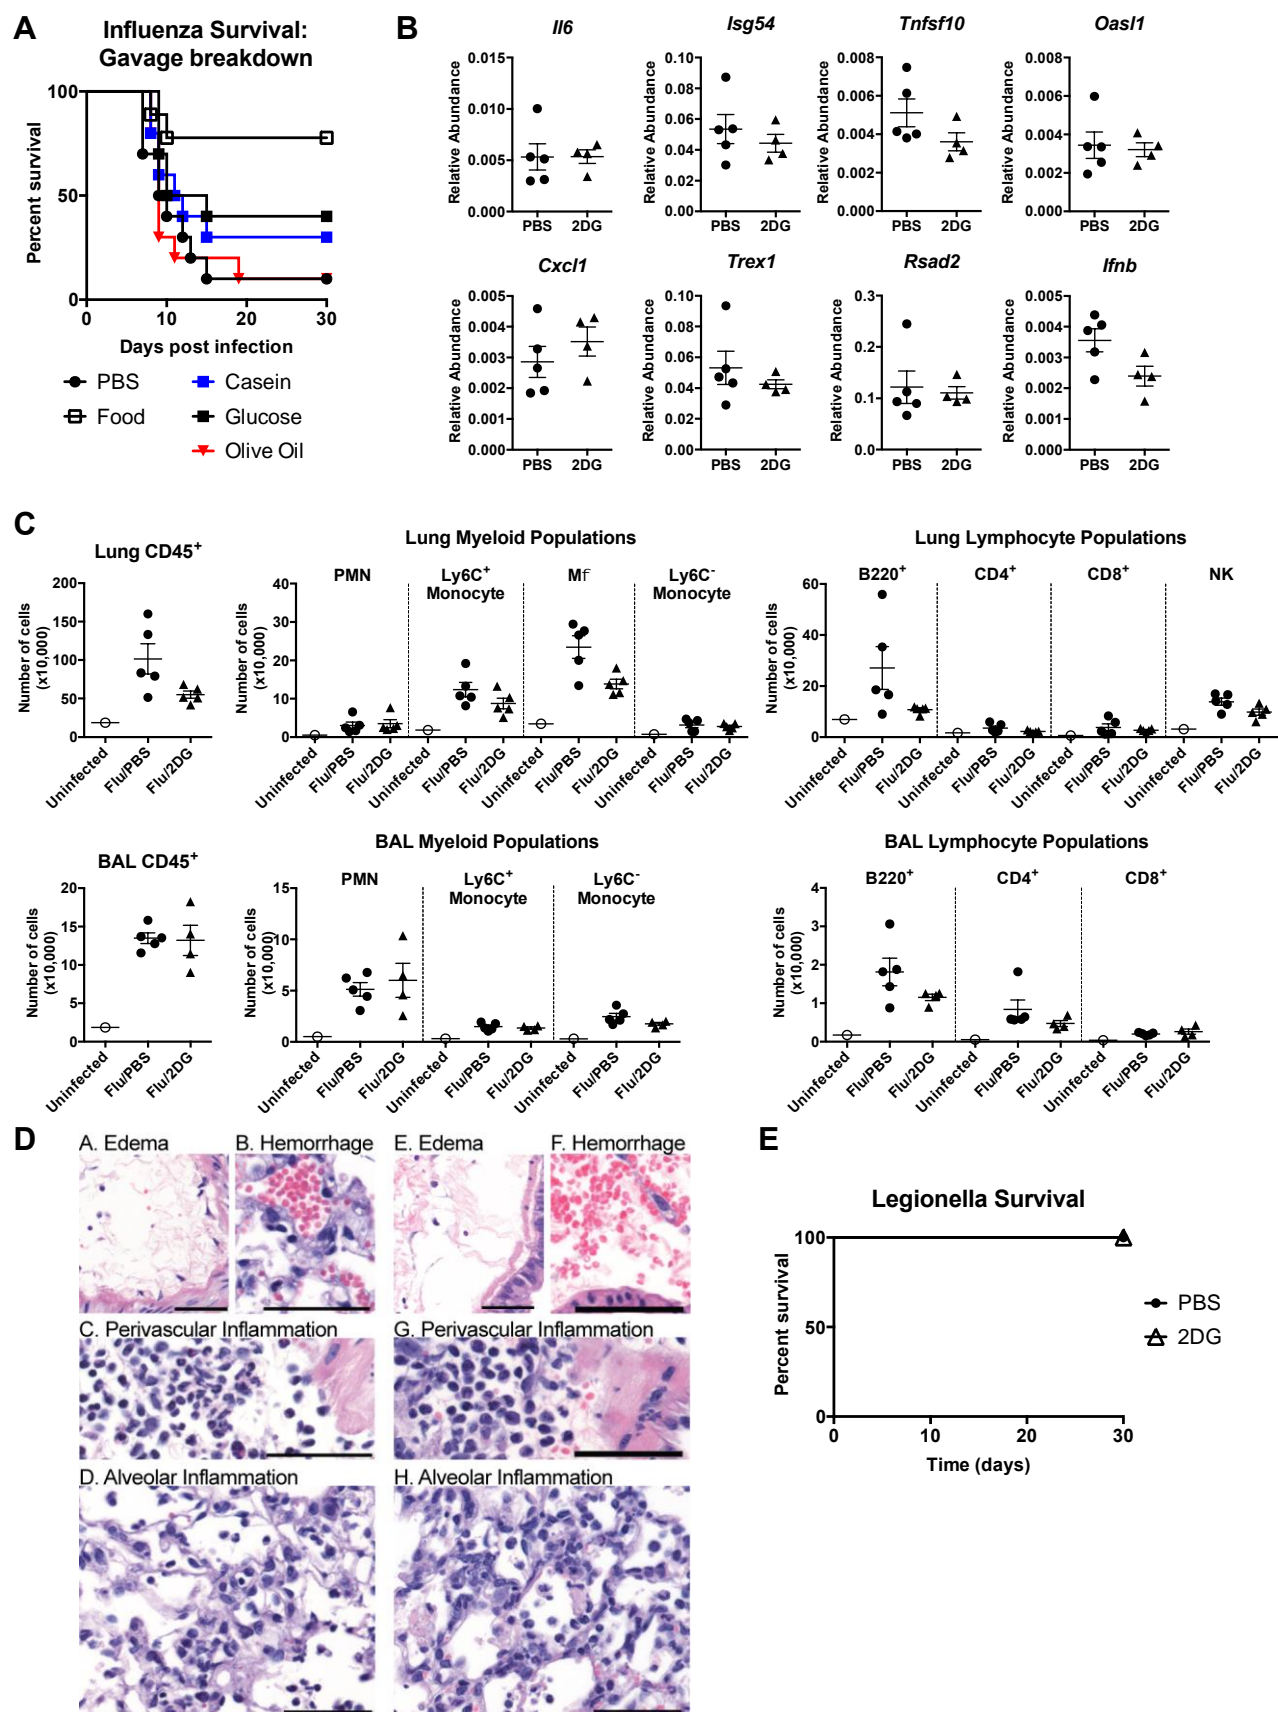

**Figure S3. The effect of caloric supplementation or inhibition of glucose utilization on survival and lung inflammation after influenza virus infection, Related to Figure 3.**

- (A) Survival after infection with 800 PFU of influenza virus. Mice were gavaged with Abbott Promote (Food), casein, olive oil, or PBS vehicle. Figure 3B and 3C are a subset of Figure S3A, separated for clarity (the same PBS-treated and food-treated groups are shown).
- (B) mRNA expression of whole lung tissue at day 6 after 375 PFU of influenza virus.
- (C) Flow cytometric analysis of lung and BAL on day 6 after 700 PFU of influenza virus.
- (D) H&E staining of lung tissue 6 days after influenza virus infection. Letters correspond to areas of the lung annotated in Figure 3. Scale bar = 50  $\mu$ m.
- (E) Survival after infection with  $1 \times 10^6$  *L. pneumophila*, and treatment with IP PBS or 2DG. n=5/group. Data are represented as mean  $\pm$  SEM.

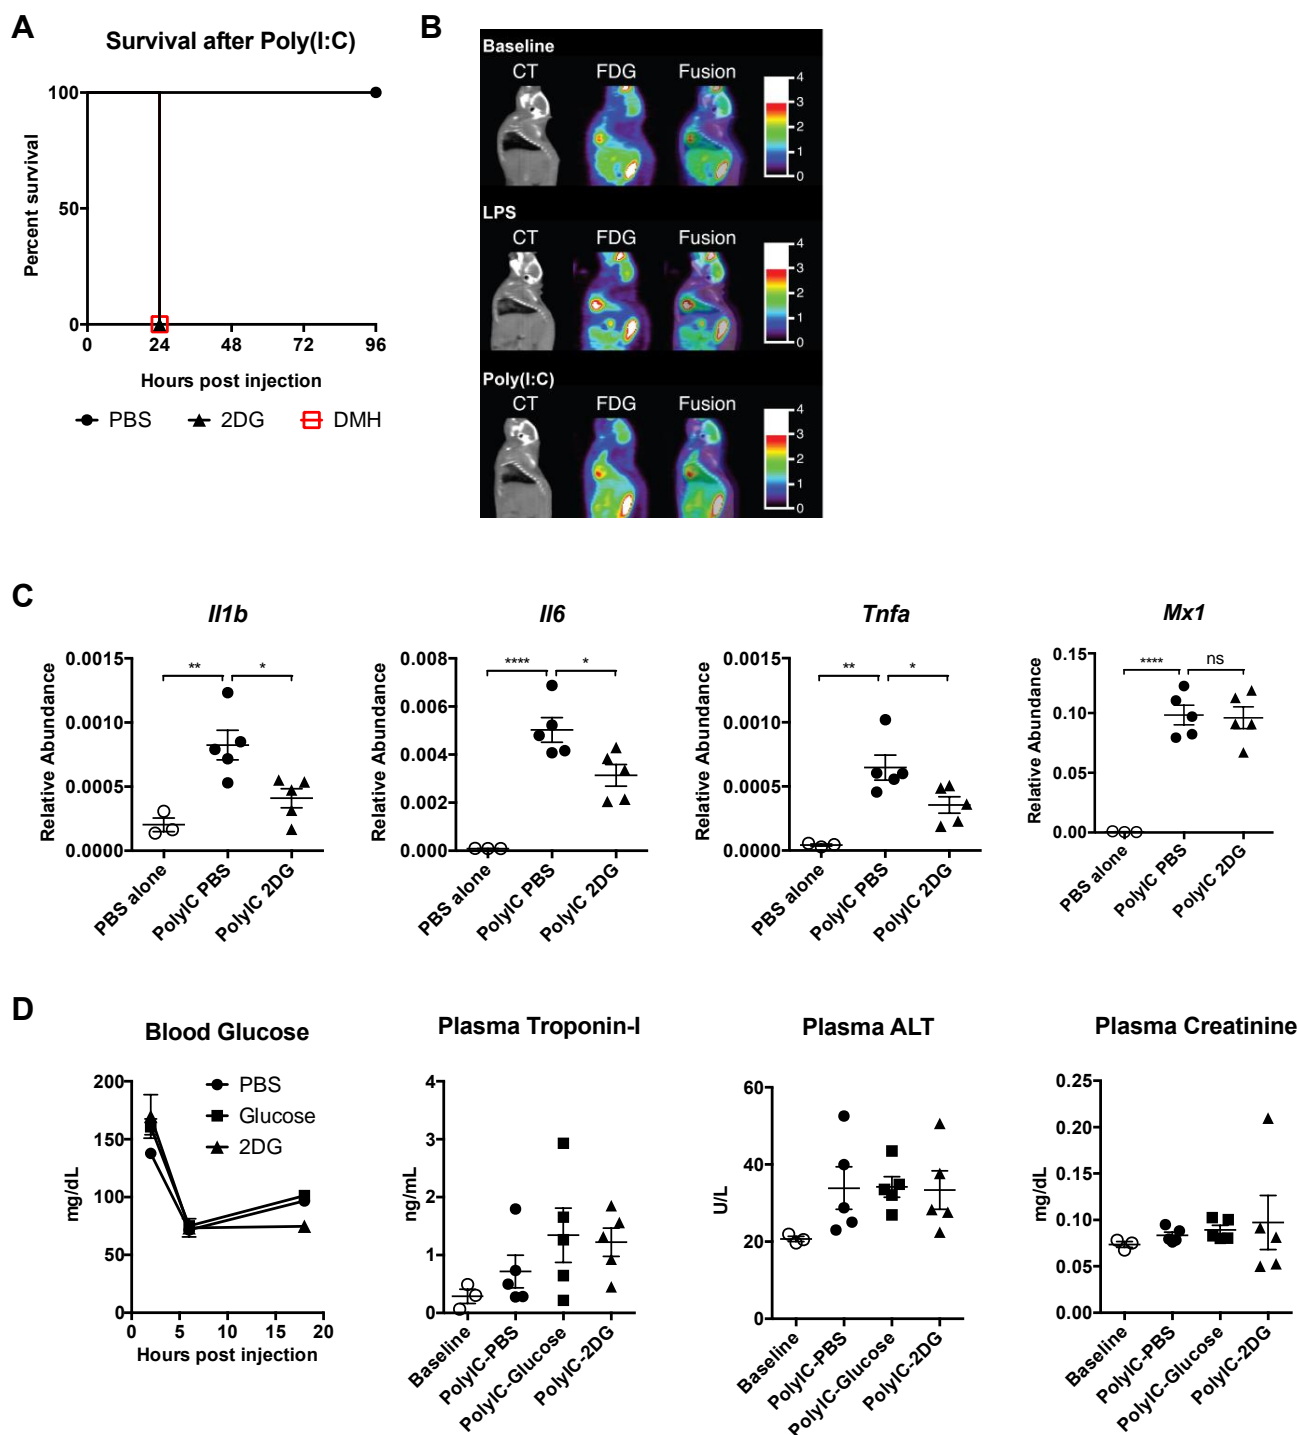

**Figure S4. Systemic effects of glucose caloric supplementation or inhibition of glucose utilization during Poly(I:C) sepsis, Related to Figure 4.**

(A) Survival of mice after Poly(I:C) challenge and treatment with either IP PBS, 2DG, or DMH.

(B) Averaged sagittal PET images after PBS vehicle (baseline), LPS, and Poly(I:C) administration. CT, computed tomography; FDG, 2-deoxy-2-[ $^{18}\text{F}$ ] fluorodeoxy-D-glucose.  $n=3/\text{group}$ .

(C-D) Mice were challenged with Poly(I:C), then treated with either IP PBS, glucose, or 2DG.

(C) Hindbrain mRNA expression 4 hours after Poly(I:C) administration and indicated treatments.  $n=3-5/\text{group}$ .

(D) Blood glucose measured at 2, 6, and 18 hours after Poly(I:C) and indicated treatments. Plasma troponin-I, ALT and creatinine measured at 24 hours after Poly(I:C).

Data are represented as mean  $\pm$  SEM. \* $p < 0.05$ , \*\* $p < 0.01$ , \*\*\*\* $p < 0.0001$ . n.s., not significant.

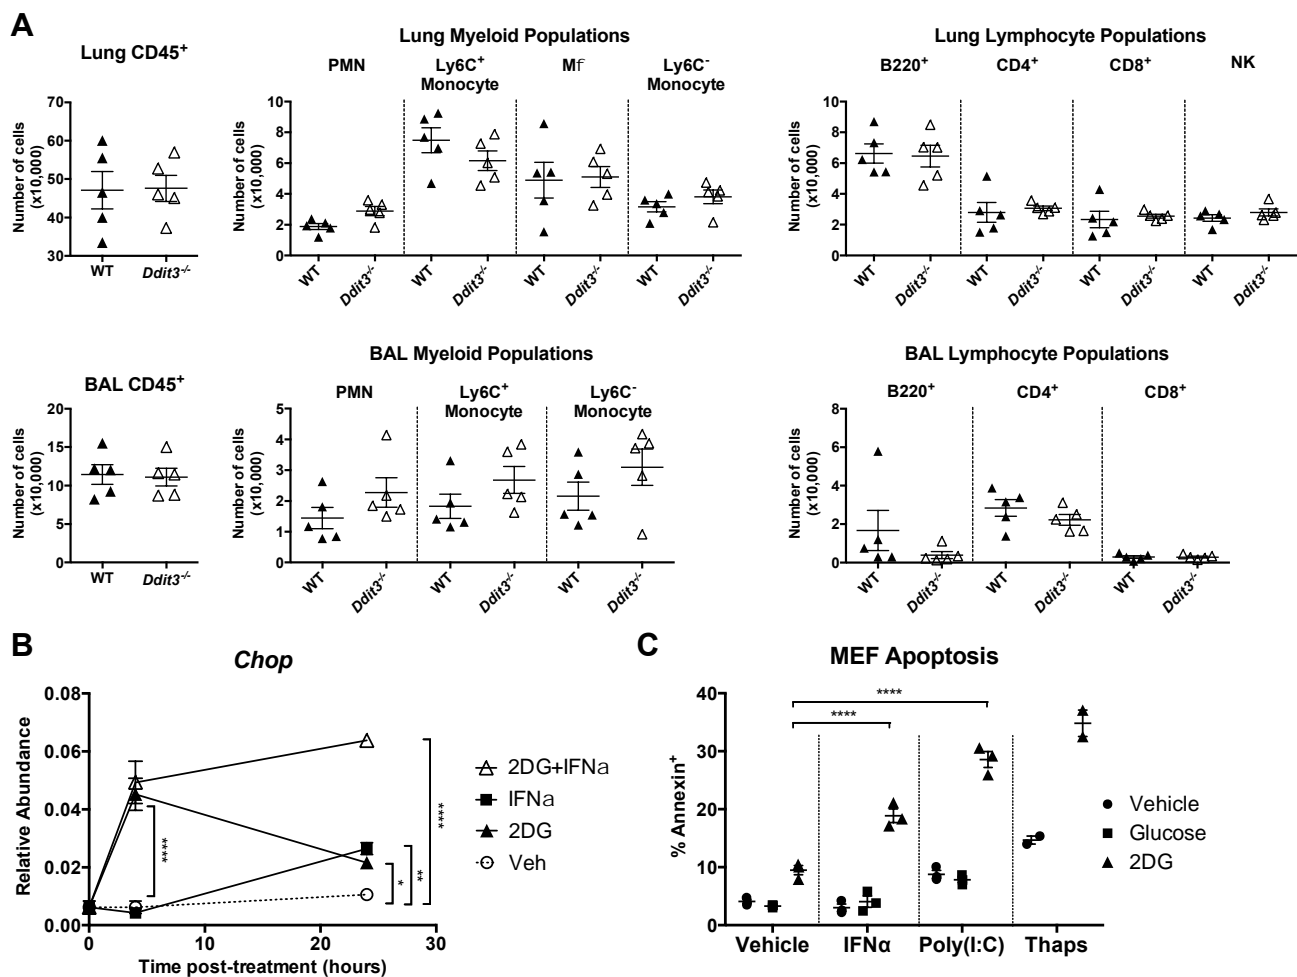

**Figure S5. The effect of inhibiting glucose utilization on inflammation and ER stress during viral inflammation, Related to Figure 5.**

(A) Flow cytometric analysis of Lung and BAL on day 5 after infection with 700 PFU of influenza virus in B6 WT and *Ddit3*<sup>-/-</sup> mice.

(B) Mouse embryonic fibroblasts (MEFs) treated with vehicle, IFN $\alpha$ , 2DG, or IFN $\alpha$  and 2DG. mRNA expression at 0, 4, and 24 hours after treatment. n=3 replicates per group. Data representative of two independent experiments.

(C) MEFs treated with vehicle, IFN $\alpha$ , Poly(I:C), and Thapsigargin (Thaps), in the presence of vehicle, glucose or 2DG for 24 hours. Flow cytometric analysis for Annexin V. Two-three replicates per group. Data representative of three independent experiments.

Data are represented as mean  $\pm$  SEM. \*p<0.05, \*\*p<0.01, \*\*\*\*p<0.0001

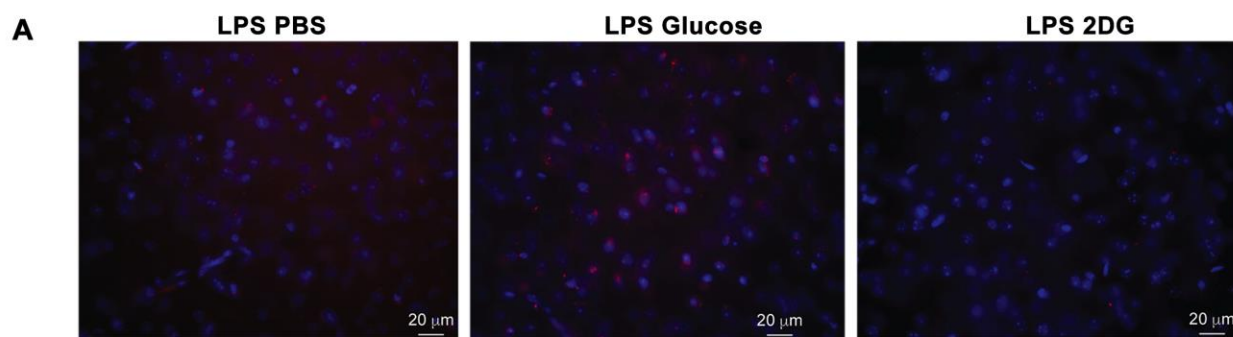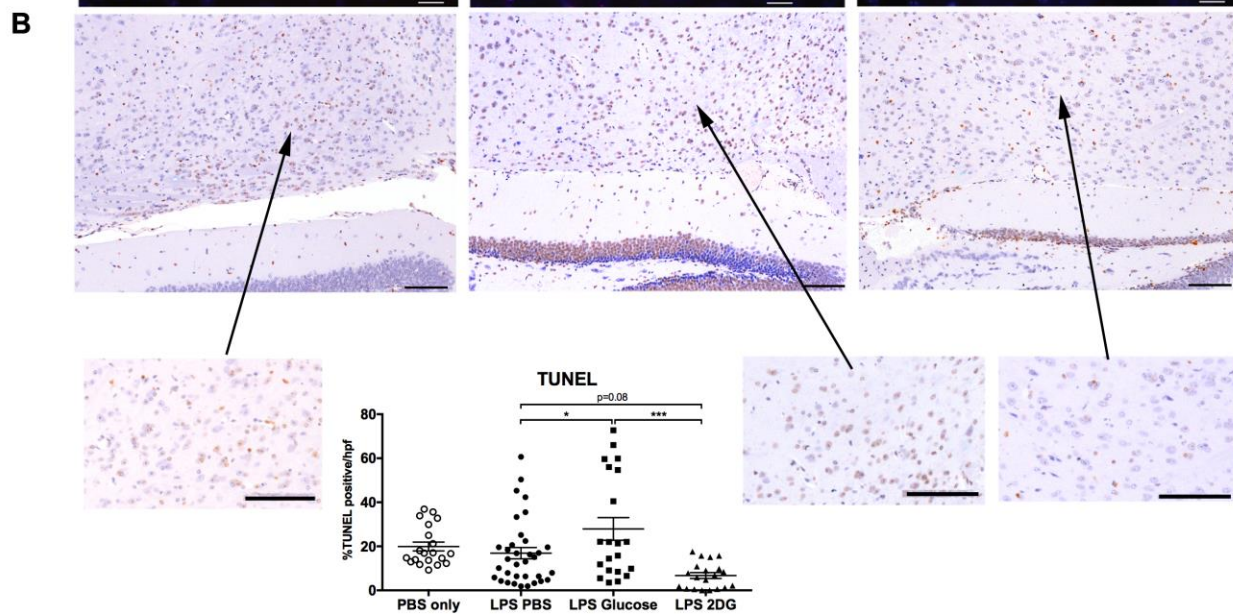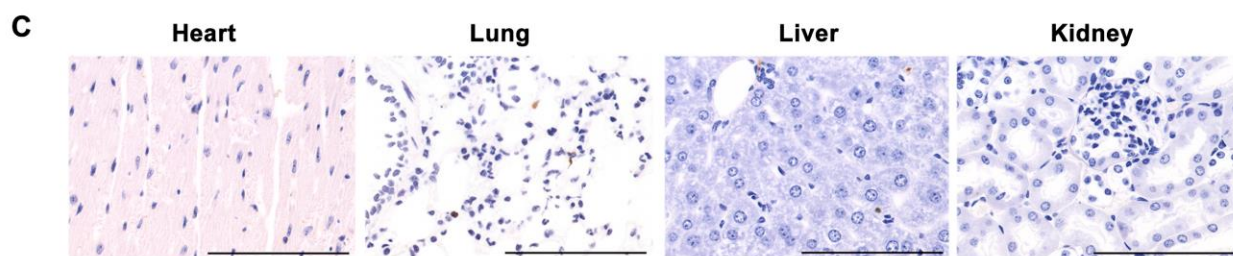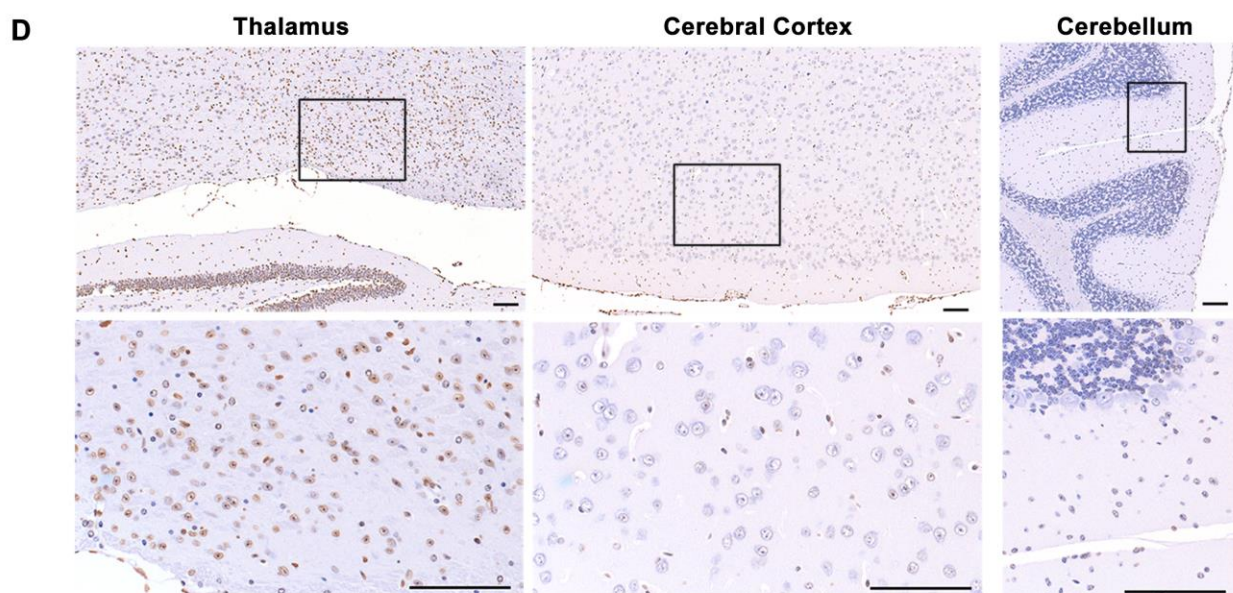

**Figure S6. Histopathology of LPS sepsis, Related to Figure 6.**

(A) Mice were given IP LPS then initiated with IP PBS, glucose, and 2DG treatment. Dihydroethidium staining of brain 24 hours after LPS.

(B) TUNEL-stained sections of brain 24 hours after LPS and treatment with PBS, glucose, or 2DG. 3,3'-Diaminobenzidine (DAB) hematoxylin, scale bars = 100  $\mu$ m. Quantification of TUNEL positive cells per 400x power field. n=3/group.

(C) Representative images of TUNEL-stained sections of heart, lung, liver, and kidney 24 hours post-LPS. DAB Hematoxylin, scale bars = 100  $\mu$ m.

(D) Representative sections of TUNEL-stained thalamus, cerebral cortex, and cerebellum 24 hours post-LPS in WT mice. DAB Hematoxylin, scale bars = 100  $\mu$ m.

Data are represented as mean  $\pm$  SEM.

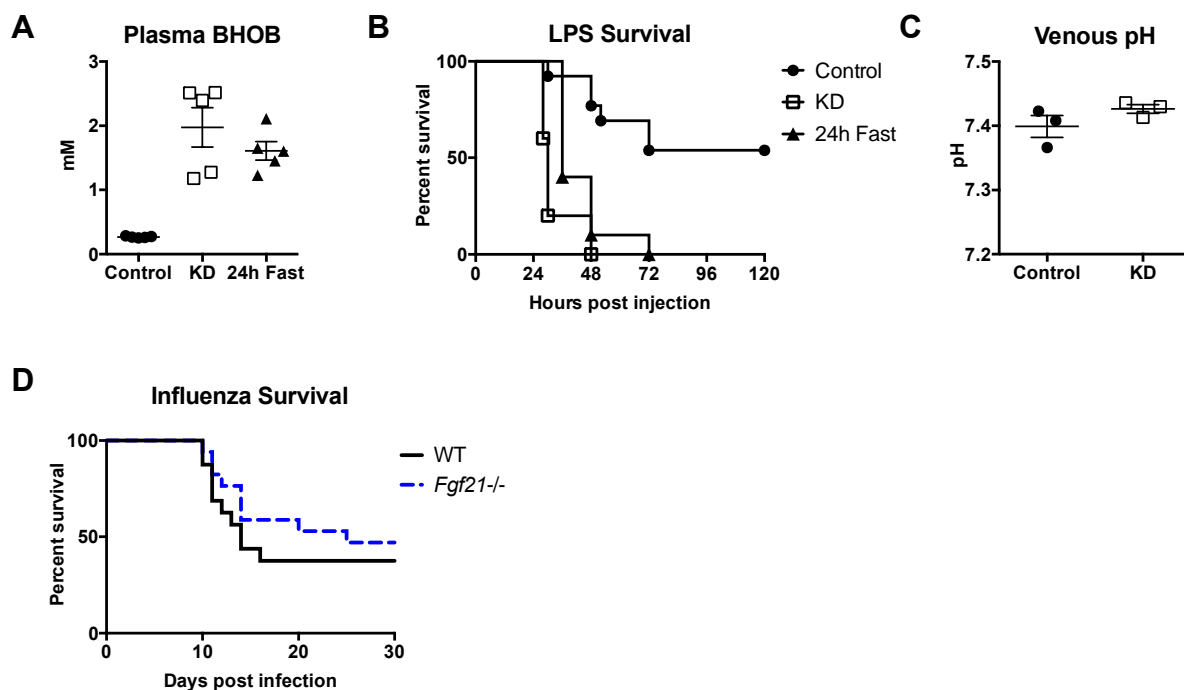

**Figure S7. Investigation of the ketogenic program in bacterial and viral inflammation, Related to Figure 6.**

(A) Plasma BHOB levels after 3 days of ketogenic diet (KD) and 24 hours of fasting compared to control fed mice. Control vs KD diet  $p=0.0001$ ; Control vs 24h Fast  $p=0.0011$ .  $n=5/\text{group}$ .

(B) Survival after 10 mg/kg IP LPS in mice on control diet, after 3 days of ketogenic diet (KD), and after 24 hours of fasting. Control vs KD  $p=0.0002$ ; Control vs 24h Fast  $p=0.0007$ .

(C) Venous blood gas measured in mice on control diet and 3 days after ketogenic diet (KD).

(D) Survival after 375 PFU influenza in WT and *Fgf21*<sup>-/-</sup> mice.

Data are represented as mean  $\pm$  SEM.
